# Supplementary material for: Latest culture techniques: cracking the secrets of bone marrow to mass-produce erythrocytes and platelets ex vivo
Source: PubMed Central journal article supplement — Haematologica. 2021 Jan 21;106(4):947–57. doi: 10.3324/haematol.2020.262485 (PMC8017859; doi:10.3324/haematol.2020.262485), 2021-01-21
Supplement: 2020_262485-Disclosures_Contributions.pdf [file 2020_262485-Disclosures_Contributions.pdf]

Haematologica  
HAEMATOL/2020/262485  
Version 3

Ultimate culture techniques: cracking the secrets of bone marrow to  
mass-produce erythrocytes and platelets ex vivo

Christian A. Di Buduo, Alicia Aguilar, Paolo M. Soprano, Alberto  
Bocconi, Carolina P. Miguel, Giovanna Mantica, and Alessandra  
Balduini

Disclosures: The authors declare no conflict of interest.

Contributions: AA, PMS, ABo, CPM, GM wrote the manuscript. CADB and ABa conceived  
the review, wrote the manuscript and gave overall direction.
